# Supplementary material
Source: publisher figshare collection journal article supplement (https://acs.figshare.com/ndownloader/files/4229371)
Supplement: Supplementary file 1 [file 4229371]

# Controlled Size Silver Nanoparticles Synthesis with Water-in-Oil Microemulsion Method: A Topical Review

**Jignasa N. Solanki, Zagabathuni Venkata Panchakshari Murthy\***

*Department of Chemical Engineering  
Sardar Vallabhbhai National Institute of Technology, Surat  
Surat - 395 007, Gujarat, India*

Table 1. Various control parameters, characterization tools used and particles size obtained for SNPs (silver nanoparticles) synthesis with microemulsion technique.

| Surfactant+<br>Co-surfactant          | Ag<br>precursor                         | Reducing<br>agent                                  | Continuous<br>Organic<br>Phase     | Control<br>parameters<br>studied                  | $\omega$                             | Charac-<br>terization                | Particle<br>size /avg. dia, nm                                                                                                                               | Remarks                                                                                                                                                                                                 | Ref |
|---------------------------------------|-----------------------------------------|----------------------------------------------------|------------------------------------|---------------------------------------------------|--------------------------------------|--------------------------------------|--------------------------------------------------------------------------------------------------------------------------------------------------------------|---------------------------------------------------------------------------------------------------------------------------------------------------------------------------------------------------------|-----|
| AOT                                   | AgNO <sub>3</sub>                       | NaBH <sub>4</sub>                                  | Diethyl ether                      | ---                                               |                                      | FT-IR,<br>TEM, XPS,UV,<br>TGA-DTA,EA |                                                                                                                                                              | Capped by dodacanethiol                                                                                                                                                                                 | 22  |
| CTAB,<br>Dh                           | AgNO <sub>3</sub><br>HAuCl <sub>4</sub> | NaBH <sub>4</sub><br>and<br>quercetin              | n-hexanol                          | ---                                               | 12.1                                 | UV<br>NMR                            | 5-6 nm                                                                                                                                                       | Single microemulsion scheme is used.<br>Ultrasonication gave more uniform particles.<br>Transferred to aqueous phase.                                                                                   | 28  |
| C <sub>12</sub> E <sub>5</sub>        | AgNO <sub>3</sub>                       | NaBH <sub>4</sub>                                  | Cyclohexane                        | $\omega$                                          | 1.13<br>2.26<br>4.5<br>9<br>18<br>36 | UV<br>EM                             | 3.3 ( $\omega$ =1.12)<br>4.4 ( $\omega$ =2.25)<br>8.8 ( $\omega$ =4.5)<br>8.8 ( $\omega$ =9)<br>6.6 ( $\omega$ =18)<br>4.4 ( $\omega$ =36)                   | Most uniform particles at $\omega$ = 36 i.e. rw=0.8 (8.8 nm).                                                                                                                                           | 29  |
| Ag(AOT)<br>Na(AOT)                    | AgNO <sub>3</sub><br>Ag(AOT)            | NaBH <sub>4</sub><br>N <sub>2</sub> H <sub>4</sub> | Cyclohexane (Ch)<br>Isooctane (Io) | $\omega$ ,<br>type of RA.,<br>type of oil         | 2<br>5<br>7.5<br>12.5                | SAXS,<br>UV<br>TEM, HRTEM,<br>ED     | <b>Ch:</b><br>2.5 ( $\omega$ =5)<br>5.5 ( $\omega$ =7.5)<br>7 ( $\omega$ =15)<br><b>Io:</b><br>2.7 ( $\omega$ =5)<br>3 ( $\omega$ =7.5)<br>7 ( $\omega$ =15) | Smaller particles were favored at low $\omega$ .<br>Replacing isooctane by cyclohexane induced a decrease in<br>the intermicellar exchange rate constant.                                               | 30  |
| Ag(AOT)<br>Na(AOT)                    | AgNO <sub>3</sub><br>Ag(AOT)            | Na(AOT)/<br>N <sub>2</sub> H <sub>4</sub>          | Isooctane                          | $\omega$                                          |                                      |                                      | 2 to 7 nm, on<br>increasing water<br>droplet size                                                                                                            | Addition of dodecane thiol and extracted from reverse micelles<br>by SSP method reduced the size.                                                                                                       | 31  |
| AOT                                   | AgNO <sub>3</sub>                       | NaBH <sub>4</sub>                                  |                                    | $\omega$ Cm, C <sub>R</sub><br>type of oil,<br>Cs |                                      | HRTEM<br>ED, XRD,<br>UV              |                                                                                                                                                              | With increase in AOT concentration, number of SNPs increased,<br>but no significant change in particle size.                                                                                            | 32  |
| AOT<br>C <sub>12</sub> E <sub>4</sub> | AgNO <sub>3</sub>                       | NaBH <sub>4</sub>                                  | Isooctane                          | $\omega$<br>pCO <sub>2</sub>                      |                                      |                                      |                                                                                                                                                              | SNPs recovered by dissolving antisolvent CO <sub>2</sub> and precipitated at<br>suitable pressures.<br>Smaller particles were favored at low $\omega$ and high pCO <sub>2</sub> in recovery<br>process. | 33  |

|                                                |                                   |                                                                      |                                  |                                          |              |                    |                                                                                   |                                                                                                                                                                                                                                                                             |    |
|------------------------------------------------|-----------------------------------|----------------------------------------------------------------------|----------------------------------|------------------------------------------|--------------|--------------------|-----------------------------------------------------------------------------------|-----------------------------------------------------------------------------------------------------------------------------------------------------------------------------------------------------------------------------------------------------------------------------|----|
| Igepal CO-520                                  | AgNO <sub>3</sub>                 | N <sub>2</sub> H <sub>4</sub> ·H <sub>2</sub> O                      | Cyclohexane                      | ω                                        |              | TEM<br>ED<br>XRD   | 5 (ω=4)<br>10 (ω=6)<br>10.5 (ω=8)<br>2-5 nm                                       | The average size and distribution of the synthesized Ag particles increased slightly from 4 to 8 with increased ω.                                                                                                                                                          | 34 |
| AOT                                            | AgNO <sub>3</sub>                 | N <sub>2</sub> H <sub>4</sub> ·H <sub>2</sub> O                      | Dodecane                         | ω Cm, C <sub>R</sub>                     | 3, 5         | UV<br>TEM          |                                                                                   | Size increased with ω.                                                                                                                                                                                                                                                      | 35 |
| AOT                                            | AgNO <sub>3</sub>                 | N <sub>2</sub> H <sub>4</sub> ·H <sub>2</sub> O                      | Dodecane                         | ω Cm, (study )                           |              | TEM<br>FT-IR<br>UV | ω: 1.52(ω=2.5)<br>3.39(ω=7.5)<br>4.98(ω=15)<br>Cm:<br>3.93 (0.1 M)<br>2.6 (0.2 M) | TEM study showed that size increased with increase in ω.                                                                                                                                                                                                                    | 36 |
| <b>SDS +</b><br>isoamylalcohol                 | AgNO <sub>3</sub>                 | N <sub>2</sub> H <sub>4</sub> ·H <sub>2</sub> O                      | Cyclohexane                      | ω Cm                                     | ω,t<br>[M]   | UV<br>TEM          | 6.5 (ω=5)<br>9.4(ω=10)<br>12.1(ω=20)                                              | Monodisperse particles obtained at low ω.<br>UV study carried over only for Cm variation.                                                                                                                                                                                   | 37 |
| TritonX-100                                    | AgNO <sub>3</sub>                 | NaBH <sub>4</sub>                                                    | Cyclohexane                      | ω<br>Cm<br>(0.05, 0.1 M)                 | 1,3,<br>5,7  | DLS<br>TEM         |                                                                                   | No effect of Cm on size or λ <sub>max</sub> for Ag; whereas for bimetallic and gold particles, drastic increase in size as well as λ <sub>max</sub> was observed.                                                                                                           | 38 |
| AOT                                            | AgNO <sub>3</sub>                 | N <sub>2</sub> H <sub>4</sub> ·H <sub>2</sub> O<br>NaBH <sub>4</sub> | Cyclohexane                      | ω<br>Cm                                  |              | UV                 |                                                                                   | Smaller SNPs obtained on increasing the Cm and on decreasing the ω value.                                                                                                                                                                                                   | 39 |
| AOT                                            | AgNO <sub>3</sub>                 | N <sub>2</sub> H <sub>4</sub> ·H <sub>2</sub> O                      | Dodecane                         | C <sub>S</sub>                           | -            |                    | 3.9 nm (C <sub>S</sub> =0.2 M)<br>1.6 nm (C <sub>S</sub> =0.4 M)                  | Smaller SNPs obtained on increasing the Cm.                                                                                                                                                                                                                                 | 40 |
| AOT<br>SDS<br>DTAB<br>NP-5                     | AgNO <sub>3</sub>                 | NaBH <sub>4</sub>                                                    | Cyclohexane<br>heptane<br>decane | type of oil,<br>Additional<br>surfactant |              | UV<br>TEM          |                                                                                   | With increased chain length of the oil, intermicellar exchange rate coefficient increased leading to decreased particle size.<br>Particle size decreased considerably on addition of a nonionic surfactant (NP-5), but no change was observed with DTAB and SDS.            | 41 |
| AOT                                            | Cd(NO <sub>3</sub> ) <sub>2</sub> | Na <sub>2</sub> S                                                    | Isooctane                        |                                          |              | UV                 |                                                                                   | Used a combined approach of spectroscopy and Monte Carlo simulation and found it to be helpful in elucidating the mechanism of formation                                                                                                                                    | 42 |
| AOT                                            | AgNO <sub>3</sub>                 | NaBH <sub>4</sub>                                                    | Cyclohexane                      | ω,type of oil,<br>Addition of<br>cations |              | TEM                |                                                                                   | Intermicellar exchange rate varied by type of oil, ω and by addition of benzyl alcohol and cations.<br>Particle size, the polydispersity, and the number of particles formed were dependent on the intermicellar exchange rate and/or the rigidity of the surfactant shell. | 43 |
| AOT                                            | AgNO <sub>3</sub>                 | NaBH <sub>4</sub>                                                    | Isooctane                        |                                          |              |                    |                                                                                   | Simulation is only performed on experimental work taken from literature.<br>Autocatalysis and ripening, favor the slow growth of the biggest nanoparticles leading to the production of larger particles when the reaction is slower.                                       | 44 |
| AOT                                            | -                                 | -                                                                    | -                                | -                                        | -            | -                  | -                                                                                 | Effects of additives (e.g. alcohols) on the exchange kinetics is studied                                                                                                                                                                                                    | 45 |
| C <sub>12</sub> E <sub>4</sub> /Brij 30<br>AOT | AgNO <sub>3</sub>                 | C <sub>12</sub> E <sub>4</sub>                                       | Cyclohexane<br>heptane<br>decane | Cm                                       |              | UV<br>TEM          |                                                                                   | Surfactants act both as reducing agent and structure-directing agent.<br>Cm variation did not affect droplet's size and shape noticeably.                                                                                                                                   | 46 |
| CTAB,<br>SDOSS,<br>AOT                         | AgNO <sub>3</sub>                 | NaBH <sub>4</sub><br>And quercetin                                   | Isooctane<br>Chloroform          | ω, type of<br>RA.                        | 3.62<br>-7.5 |                    | 5-15 nm size<br>various RA and<br>solvent<br>combination                          | Vietnamese chitosan used as stabilizer.<br>Inhibition in 30 min exposure time was as follows:<br>E.coli of 3 ppm,<br>TPC and fungi of 15 ppm,<br>Vibrio Cholerae cells of 0.5 ppm.                                                                                          | 47 |
| AOT                                            | AgNO <sub>3</sub>                 | Quercetine                                                           | Octane<br>Heptane                | t, R                                     | 1-10         | UV,<br>Surface     | 1-1.5 nm                                                                          | No change was observed in size with time or reducing agent concentration.                                                                                                                                                                                                   | 48 |

|                                          |                                                          |                                                 |                                  |                               |               |                                  |                                                                                                     |                                                                                                                                                                                                                                                                         |    |
|------------------------------------------|----------------------------------------------------------|-------------------------------------------------|----------------------------------|-------------------------------|---------------|----------------------------------|-----------------------------------------------------------------------------------------------------|-------------------------------------------------------------------------------------------------------------------------------------------------------------------------------------------------------------------------------------------------------------------------|----|
| SFAE                                     | AgNO <sub>3</sub>                                        | N <sub>2</sub> H <sub>5</sub> OH                | Isooctane                        |                               |               | plasmon spectra<br>TEM           |                                                                                                     | The resultant silver colloid could be preserved for at least 1 month without precipitation.                                                                                                                                                                             | 49 |
| NP-5, NP-9, NP-11 + pentanol             | AgNO <sub>3</sub>                                        | NaBH <sub>4</sub>                               | Cyclohexane                      | Type of surf.                 | 35            | UV<br>TEM                        | 18.6 (NP-5)<br>6.25 (NP-9)<br>15.2 (NP-11)                                                          | NP-5 and NP-11 gave larger SNPs than NP-9 due to their lamellae like Structure.                                                                                                                                                                                         | 50 |
| AOT                                      | AgNO <sub>3</sub>                                        | N <sub>2</sub> H <sub>4</sub>                   | Cyclohexane                      |                               | 4-10<br>25-30 | UV<br>TEM,<br>SANS               | Spherical<br>cylindrical                                                                            | Size and shape were found to be composition dependent.                                                                                                                                                                                                                  | 51 |
| Rhamnolipid                              | AgNO <sub>3</sub>                                        | NaBH <sub>4</sub>                               | n- heptane                       | t                             |               | UV<br>TEM,<br>AFM                | 2-8 nm (TEM)<br>6-11 nm (AFM)                                                                       | Green biosurfactant, small aggregation, Spherical, Intrinsic enlarging effect of pin point in AFM.                                                                                                                                                                      | 52 |
| 18-3(OH)-18 (gemini surfactant)          | AgNO <sub>3</sub>                                        | NaBH <sub>4</sub>                               | n- heptane                       | -                             | -             | TEM,<br>AFM UV-vis<br>XRD<br>XPS | silica-coated<br>SNPs                                                                               | Visible luminescence at 448 nm.                                                                                                                                                                                                                                         | 53 |
| Ag(AOT)<br>Na(AOT)                       | AgNO <sub>3</sub><br>Ag(AOT)                             | N <sub>2</sub> H <sub>4</sub>                   | Isooctane                        | -                             | 40            | UV<br>TEM<br>SAXS                | 3.4<br>3.5 (after<br>extraction)<br>4.1 (after SPP)                                                 | More smaller and less polydispersity after extraction and fractionation.                                                                                                                                                                                                | 54 |
| AOT                                      | AgNO <sub>3</sub>                                        | NaH <sub>2</sub> PO <sub>2</sub>                | Isooctane                        | -                             | 6             | UV,<br>Flourescens,<br>STM       | 2D- 3.2 nm<br>nanodiscs,<br>3D-1.5 nm<br>nanostructures                                             | Cluster formation<br>1 <sup>st</sup> stage- 2D<br>2 <sup>nd</sup> stage-3D                                                                                                                                                                                              | 56 |
| SDS +<br>isoamylalcohol<br>Igepal CO-520 | AgNO <sub>3</sub>                                        | N <sub>2</sub> H <sub>4</sub> ·H <sub>2</sub> O | Cyclohexane                      |                               | 5             | TEM                              | 6.5                                                                                                 | Flake-like powders on centrifugation (self assembled).                                                                                                                                                                                                                  | 57 |
|                                          | AgNO <sub>3</sub> -<br>Pd(NO <sub>3</sub> ) <sub>2</sub> | NH <sub>4</sub> OH                              | Cyclohexane<br>isooctane         |                               |               | TEM-EDS                          |                                                                                                     | On increasing ω, the Ag-Pd particles distribution of the core-shell composite particles was influenced and the distribution of Ag-Pd particles was broadened.<br>On increase in AgNO <sub>3</sub> solution, sizes of both the types of nanoparticles linearly increased | 58 |
| AOT+<br>SDS                              | AgNO <sub>3</sub>                                        | NaH <sub>2</sub> PO <sub>2</sub>                | Toluene                          |                               |               | XRD<br>AAS<br>HRTEM              |                                                                                                     | Yields obtained were much higher than typical yields.                                                                                                                                                                                                                   | 59 |
| AOT+<br>SDS                              | AgNO <sub>3</sub>                                        | NaBH <sub>4</sub>                               | Toluene                          | C <sub>R</sub><br>Dosing time |               | XRD<br>AAS<br>TEM                | 3 nm                                                                                                | At higher and medium C <sub>R</sub> values, formation of only worm-like structures promoted; but at low values, mixture of Ag nanoparticles (≈ 3 nm) and worm-like structures promoted.<br>Yields obtained were much higher than typical yields.                        | 60 |
| Oleylamine                               | AgNO <sub>3</sub>                                        | Ascorbic<br>acid                                | Toluene                          |                               |               | FE-SEM                           | Silica-coated<br>SNPs                                                                               |                                                                                                                                                                                                                                                                         | 61 |
| 1-dodecanethiol                          | AgNO <sub>3</sub>                                        | NaBH <sub>4</sub>                               | Toluene                          | Cm.<br>t <sub>rea</sub>       |               | TEM,<br>UV<br>XRD<br>FT-IR       | t <sub>rea</sub> = 24 h:<br>35 (Cm=0.03M)<br>30(Cm=0.01M)<br>t <sub>rea</sub> =6 h:<br>21,Cm=0.03M) | DTAB is used as phase transfer agent.<br>Self assembled to give 0-D quanta-dot arrays.<br>Single microemulsion scheme is used.                                                                                                                                          | 62 |
| AOT+<br>Arlacel-20                       | AgNO <sub>3</sub>                                        |                                                 | n- heptane<br>Decane<br>Dodecane | ω                             | 5<br>10       | UV                               |                                                                                                     | G (Growth rate) increases.<br>Slow with Ghept>Gdecane>Gdodecane                                                                                                                                                                                                         | 63 |

18-3(OH)-18: 2-hydroxy-1, 3-bis(octadecyldimethylammonium) propane dibromide (a gemini surfactant)

AAS: Atomic absorption spectroscopy

AFM: Atomic force microscopy

AOT: Sodium bis-(2-ethylhexyl) sulfosuccinate

C<sub>12</sub>E<sub>4</sub>/Brij 30: Tetraethylene glycol dodecyl ether

C<sub>12</sub>E<sub>5</sub>: Pentaethylene glycol monododecyl ether

|                                                   |                                                                                                                                                                |
|---------------------------------------------------|----------------------------------------------------------------------------------------------------------------------------------------------------------------|
| C <sub>m</sub> :                                  | metal (Ag) ion concentration                                                                                                                                   |
| C <sub>R</sub> :                                  | concentration of reducing agent                                                                                                                                |
| C <sub>s</sub> :                                  | surfactant concentration                                                                                                                                       |
| CTAB:                                             | Cetyltrimethylammonium bromide                                                                                                                                 |
| Dh:                                               | Dodecyl-heptaethyleneglycol-ether (C <sub>12</sub> H <sub>25</sub> -O-(CH <sub>2</sub> -CH <sub>2</sub> -O) <sub>6</sub> CH <sub>2</sub> -CH <sub>2</sub> -OH) |
| DLS:                                              | Dynamic light scattering                                                                                                                                       |
| DTAB:                                             | n-Dodecyl trimethylammonium bromide                                                                                                                            |
| EA:                                               | elemental analyses                                                                                                                                             |
| ED:                                               | Electron diffraction                                                                                                                                           |
| FT-IR:                                            | Fourier transform infra red spectroscopy                                                                                                                       |
| HRTEM:                                            | High-resolution transmission electron microscopy                                                                                                               |
| Igepal CO-520:                                    | Poly (oxyethylene) nonylphenyl ether                                                                                                                           |
| N <sub>2</sub> H <sub>4</sub> ·H <sub>2</sub> O : | Hydrazine hydrate                                                                                                                                              |
| N <sub>2</sub> H <sub>5</sub> OH :                | Hydrazinium hydroxide                                                                                                                                          |
| NaBH <sub>4</sub> :                               | Sodium borohydrate                                                                                                                                             |
| p <sub>CO2</sub> :                                | Antisolvent CO <sub>2</sub> pressure                                                                                                                           |
| RA:                                               | Reducing agent                                                                                                                                                 |
| SANS:                                             | small-angle neutron scattering                                                                                                                                 |
| SAXS:                                             | Small-angle X-ray scattering                                                                                                                                   |
| SDOSS:                                            | Sodium dioctyl sulfosuccinate                                                                                                                                  |
| SDS:                                              | Sodium dodecyl sulfate                                                                                                                                         |
| SFAE:                                             | Sucrose fatty acid esters                                                                                                                                      |
| STM:                                              | Scanning tunneling microscopy                                                                                                                                  |
| TEM:                                              | Transmission electron microscopy                                                                                                                               |
| TEM-EDS:                                          | Transmission Electron Microscopy-Energy- Dispersion Spectrum                                                                                                   |
| TEOS:                                             | Tetraethyl orthosilicate                                                                                                                                       |
| TPC:                                              | Total aerobic bacteria                                                                                                                                         |
| UV:                                               | UV-vis absorption spectroscopy                                                                                                                                 |
| XPS:                                              | X-ray photoelectron spectroscopy                                                                                                                               |
| XRD:                                              | X-ray diffraction                                                                                                                                              |
| ω:                                                | Water to surfactant mole ratio                                                                                                                                 |

Ref 63: Shah, D. O.; Bagwe, R. P.; Parmer, B. S. The effect of interfacial viscosity on the kinetics of formation of silver nanoparticles using water-in-oil microemulsions as nanoreactors. *Mat. Res. Soc. Symp. Proc.* **2002**, 704 (*Nanoparticle Materials*), 327.
